# Supplementary material for: Association Between Smoking Behavior and Cognitive Functioning in Patients With Psychosis, Siblings, and Healthy Control Subjects: Results From a Prospective 6-Year Follow-Up Study
Source: Atypon-hosted journal article supplement (doi:10.1176/appi.ajp.2018.18010069), 2018-08-02
Supplement: appi.ajp.2018.18010069.ds001.pdf [file appi.ajp.2018.18010069.ds001.pdf]

Data Supplement for Vermeulen et al., Association Between Smoking Behavior and Cognitive Functioning in Patients With Psychosis, Siblings, and Healthy Control Subjects: Results From a Prospective 6-Year Follow-Up Study. *Am J Psychiatry* (doi: 10.1176/appi.ajp.2018.18010069)

The GROUP investigators are Therese van Amelsvoort<sup>a</sup>, Behrooz Z. Alizadeh<sup>b</sup>, Agna A. Bartels-Velthuis<sup>b</sup>, Nico J. van Beveren<sup>c,d,e</sup>, Richard Bruggeman<sup>b</sup>, Wiepke Cahn<sup>f</sup>, Lieuwe de Haan<sup>g</sup>, Philippe Delespaul<sup>a</sup>, Carin J. Meijer<sup>g</sup>, Inez Myin-Germeys<sup>h</sup>, Rene S. Kahn<sup>f</sup>, Frederike Schirmbeck<sup>g</sup>, Claudia J.P. Simons<sup>a,i</sup>, Neeltje E. van Haren<sup>f</sup>, Jim van Osg<sup>j</sup>, Ruud van Winkel<sup>h</sup>

<sup>a</sup> Maastricht University Medical Center, Department of Psychiatry and Psychology, School for Mental Health and Neuroscience, Maastricht, The Netherlands;

<sup>b</sup> University of Groningen, University Medical Center Groningen, University Center for Psychiatry, Groningen, The Netherlands;

<sup>c</sup> Antes Center for Mental Health Care, Rotterdam, The Netherlands;

<sup>d</sup> Erasmus MC, Department of Psychiatry, Rotterdam, The Netherlands;

<sup>e</sup> Erasmus MC, Department of Neuroscience, Rotterdam, The Netherlands;

<sup>f</sup> University Medical Center Utrecht, Department of Psychiatry, Brain Center Rudolf Magnus, Utrecht, The Netherlands;

<sup>g</sup> Academic Medical Center, University of Amsterdam, Department of Psychiatry, Amsterdam, The Netherlands;

<sup>h</sup> KU Leuven, Department of Neuroscience, Research Group Psychiatry, Center for Contextual Psychiatry, Leuven, Belgium;

<sup>i</sup> GGzE, Institute for Mental Health Care Eindhoven and De Kempen, Eindhoven, The Netherlands;

<sup>j</sup> King's College London, King's Health Partners, Department of Psychosis Studies, Institute of Psychiatry, London, United Kingdom

## Section 1

Linear mixed-model results regarding the association between smoking and neurocognitive tasks.

| <b>Speed of processing , WAIS digit symbol coding, Total raw score (0-133)</b> |                 |           |          |                |
|--------------------------------------------------------------------------------|-----------------|-----------|----------|----------------|
| <b>Patients n=928</b>                                                          |                 |           |          |                |
| <i>Fixed effects</i>                                                           | <i>Estimate</i> | <i>SE</i> | <i>t</i> | <i>p-value</i> |
| Intercept                                                                      | 69.75414        | 1.33591   | 51.955   | < 2e-16        |
| Smoking, yes                                                                   | -2.37791        | 0.84000   | -2.814   | 0.004948       |
| Time 1                                                                         | 1.63586         | 0.68458   | 2.384    | 0.017372       |
| Time 2                                                                         | 1.19917         | 0.77474   | 1.543    | 0.123220       |
| Gender, female                                                                 | 6.78526         | 1.11587   | 6.063    | 1.93e-09       |
| Age                                                                            | -0.43853        | 0.06461   | -6.767   | 2.32e-11       |
| Antipsychotic medication, yes                                                  | -4.67082        | 1.12619   | -4.122   | 4.00e-05       |
| Cannabis, urine positive                                                       | 0.49692         | 1.05769   | 0.467    | 0.640584       |
| Education                                                                      | 0.53858         | 0.09478   | 5.647    | 1.97e-08       |
| PANSS, negative subscale                                                       | -2.43701        | 0.53033   | -4.566   | 5.40e-06       |
| PANSS, positive subscale                                                       | 0.21670         | 0.62020   | 0.347    | 0.728504       |
| PANSS, general subscale                                                        | -3.64291        | 1.02617   | -3.527   | 0.000436       |
| <i>Random effects</i>                                                          | <i>Variance</i> | <i>SD</i> |          |                |
| Subject Intercept                                                              | 156.82          | 12.523    |          |                |
| Time 1                                                                         | 49.07           | 7.005     |          |                |
| Time 2                                                                         | 12.59           | 3.548     |          |                |
| Residual                                                                       | 68.53           | 8.278     |          |                |

| <b>Speed of processing , WAIS digit symbol coding, Total raw score (0-133)</b> |                        |           |          |                |                        |           |          |                |
|--------------------------------------------------------------------------------|------------------------|-----------|----------|----------------|------------------------|-----------|----------|----------------|
| <i>Fixed effects</i>                                                           | <b>Siblings, n=966</b> |           |          |                | <b>Controls, n=562</b> |           |          |                |
|                                                                                | <i>Estimate</i>        | <i>SE</i> | <i>t</i> | <i>p-value</i> | <i>Estimate</i>        | <i>SE</i> | <i>t</i> | <i>p-value</i> |
| Intercept                                                                      | 77.86130               | 0.75746   | 102.59   | < 2e-16        | 80.27217               | 0.95454   | 83.809   | < 2e-16        |
| Smoking, yes                                                                   | -1.03890               | 0.65167   | -1.585   | 0.113          | -3.13119               | 1.06002   | -2.929   | 0.00348        |
| Time 1                                                                         | 3.55702                | 0.51363   | 6.912    | 8.78e-12       | 2.22904                | 0.76439   | 2.905    | 0.00385        |

|                           |                 |           |        |          |                 |           |        |          |
|---------------------------|-----------------|-----------|--------|----------|-----------------|-----------|--------|----------|
| Time 2                    | 3.73125         | 0.62795   | 5.928  | 3.97e-09 | 1.60976         | 0.84205   | 1.904  | 0.05744  |
| Gender, female            | 3.71918         | 0.88146   | 4.208  | 2.81e-05 | 7.68024         | 1.14524   | 6.675  | 5.71e-11 |
| Age                       | -0.27595        | 0.05286   | -5.208 | 2.32e-07 | -0.28940        | 0.05243   | -5.496 | 5.87e-08 |
| Cannabis, urine positive  | 1.74959         | 1.21380   | 1.434  | 0.152    | -1.88132        | 2.28876   | -0.815 | 0.41544  |
| Education                 | 0.39841         | 0.07885   | 5.027  | 5.56e-07 | 0.32818         | 0.10474   | 3.102  | 0.00200  |
| CAPE, negative subscale   | 0.44816         | 1.06565   | 0.418  | 0.676    | -0.20563        | 1.67858   | -0.121 | 0.90346  |
| Cape, positive subscale   | -7.66204        | 1.80018   | -4.234 | 2.42e-05 | -1.59375        | 2.74585   | -0.575 | 0.56530  |
| CAPE, depressive subscale | 1.05468         | 1.08575   | 0.966  | 0.334    | -1.75080        | 1.54189   | -1.125 | 0.26107  |
| <i>Random effects</i>     | <i>Variance</i> | <i>SD</i> |        |          | <i>Variance</i> | <i>SD</i> |        |          |
| Subject Intercept         | 174.41          | 13.206    |        |          | 140.85          | 11.868    |        |          |
| Time 1                    | 29.60           | 5.441     |        |          | 40.14           | 6.336     |        |          |
| Time 2                    | 32.41           | 5.693     |        |          | 34.85           | 5.904     |        |          |
| Residual                  | 42.69           | 6.533     |        |          | 52.45           | 7.243     |        |          |

| <b>Attention/Vigilance, Continuous Performance Test, accuracy (0-100)</b> |                 |           |          |                |
|---------------------------------------------------------------------------|-----------------|-----------|----------|----------------|
| <b>Patients n=916</b>                                                     |                 |           |          |                |
| <i>Fixed effects</i>                                                      | <i>Estimate</i> | <i>SE</i> | <i>t</i> | <i>p-value</i> |
| Intercept                                                                 | 98.90237        | 0.38875   | 253.276  | < 2e-16        |
| Smoking, yes                                                              | 0.03446         | 0.21564   | 0.159    | 0.873812       |
| Time 1                                                                    | 0.09257         | 0.23063   | 0.401    | 0.688780       |
| Time 2                                                                    | 0.31476         | 0.25821   | 1.215    | 0.224507       |
| Gender, female                                                            | 0.04586         | 0.24992   | 0.183    | 0.855131       |
| Age                                                                       | -0.05425        | 0.01433   | -3.767   | 0.000178       |
| Antipsychotic medication, yes                                             | -0.40019        | 0.32252   | -1.234   | 0.217453       |
| Cannabis, urine positive                                                  | 0.11347         | 0.30162   | 0.374    | 0.708513       |
| Education                                                                 | 0.08767         | 0.02751   | 3.167    | 0.001576       |
| PANSS, negative subscale                                                  | -0.73171        | 0.15692   | -4.634   | 3.9e-06        |
| PANSS, positive subscale                                                  | -0.24641        | 0.18679   | -1.311   | 0.190068       |
| PANSS, general                                                            | 0.08243         | 0.31697   | 0.258    | 0.796132       |

|                       |                 |           |  |  |
|-----------------------|-----------------|-----------|--|--|
| subscale              |                 |           |  |  |
| <i>Random effects</i> | <i>Variance</i> | <i>SD</i> |  |  |
| Subject Intercept     | 15.166          | 3.894     |  |  |
| Time 1                | 12.163          | 3.488     |  |  |
| Time 2                | 10.865          | 3.296     |  |  |
| Residual              | 8.445           | 2.906     |  |  |

| <b>Attention/Vigilance, Continuous Performance Test, accuracy (0-100)</b> |                        |           |          |                |                        |           |          |                |
|---------------------------------------------------------------------------|------------------------|-----------|----------|----------------|------------------------|-----------|----------|----------------|
| <i>Fixed effects</i>                                                      | <b>Siblings, n=947</b> |           |          |                | <b>Controls, n=552</b> |           |          |                |
|                                                                           | <i>Estimate</i>        | <i>SE</i> | <i>t</i> | <i>p-value</i> | <i>Estimate</i>        | <i>SE</i> | <i>t</i> | <i>p-value</i> |
| Intercept                                                                 | 99.343505              | 0.168694  | 587.842  | < 2e-16        | 99.630307              | 0.080116  | 1239.249 | <0.001         |
| Smoking, yes                                                              | 0.004768               | 0.131931  | 0.036    | 0.97134        | -0.012765              | 0.106280  | -0.119   | 0.904928       |
| Time 1                                                                    | 0.197011               | 0.166959  | 1.179    | 0.23878        | -0.339489              | 0.160530  | -2.109   | 0.035627       |
| Time 2                                                                    | 0.256043               | 0.133573  | 1.911    | 0.05623        | -0.268963              | 0.183047  | -1.465   | 0.143937       |
| Gender, female                                                            | -0.151213              | 0.142367  | -1.058   | 0.29041        | 0.065914               | 0.097956  | 0.670    | 0.503343       |
| Age                                                                       | -0.011451              | 0.008632  | -1.321   | 0.18675        | -0.012232              | 0.004455  | -2.733   | 0.006505       |
| Cannabis, urine positive                                                  | 0.208860               | 0.258872  | 0.802    | 0.42241        | 0.253400               | 0.221952  | 1.136    | 0.256419       |
| Education                                                                 | 0.018974               | 0.015758  | 1.197    | 0.23149        | 0.050046               | 0.012952  | 3.841    | 0.000136       |
| CAPE, negative subscale                                                   | 0.323969               | 0.223060  | 1.444    | 0.14907        | -0.422971              | 0.183461  | -2.292   | 0.022284       |
| Cape, positive subscale                                                   | -1.140002              | 0.401120  | -2.828   | 0.00475        | -0.503427              | 0.292754  | -1.710   | 0.087913       |
| CAPE, depressive subscale                                                 | 0.069733               | 0.225882  | 0.307    | 0.75898        | 0.232269               | 0.173487  | 1.331    | 0.183841       |
| <i>Random effects</i>                                                     | <i>Variance</i>        | <i>SD</i> |          |                | <i>Variance</i>        | <i>SD</i> |          |                |
| Subject Intercept                                                         | 13.513                 | 3.676     |          |                | 0.4266                 | 0.6531    |          |                |
| Time 1                                                                    | 15.395                 | 3.924     |          |                | 6.5779                 | 2.5647    |          |                |
| Time 2                                                                    | 3.016                  | 1.737     |          |                | 7.8102                 | 2.7947    |          |                |
| Residual                                                                  | 1.645                  | 1.282     |          |                | 0.6204                 | 0.7876    |          |                |

| <b>Attention/Vigilance, Continuous Performance Test, mean reaction time</b> |                       |           |          |                |
|-----------------------------------------------------------------------------|-----------------------|-----------|----------|----------------|
| <i>Fixed effects</i>                                                        | <b>Patients n=916</b> |           |          |                |
|                                                                             | <i>Estimate</i>       | <i>SE</i> | <i>t</i> | <i>p-value</i> |
| Intercept                                                                   | 434.3436              | 7.4019    | 58.405   | < 2e-16        |
| Smoking, yes                                                                | -3.0286               | 4.6875    | -0.642   | 0.5207         |
| Time 1                                                                      | -0.1326               | 3.6772    | -0.036   | 0.9713         |

|                               |                 |           |        |          |
|-------------------------------|-----------------|-----------|--------|----------|
| Time 2                        | -4.5670         | 4.7275    | -0.963 | 0.3360   |
| Gender, female                | 6.9429          | 6.0900    | 1.136  | 0.2561   |
| Age                           | 2.6339          | 0.3488    | 7.528  | 1.23e-13 |
| Antipsychotic medication, yes | 5.8847          | 6.1443    | 0.952  | 0.3412   |
| Cannabis, urine positive      | -1.0761         | 5.9428    | -0.180 | 0.8572   |
| Education                     | -0.3702         | 0.5516    | -0.667 | 0.5048   |
| PANSS, negative subscale      | -2.4039         | 2.9812    | -0.801 | 0.4231   |
| PANSS, positive subscale      | -4.4976         | 3.5564    | -1.257 | 0.2090   |
| PANSS, general subscale       | 13.5067         | 5.8704    | 2.286  | 0.0224   |
| <i>Random effects</i>         | <i>Variance</i> | <i>SD</i> |        |          |
| Subject Intercept             | 4658.6          | 68.25     |        |          |
| Time 1                        | 860.6           | 29.34     |        |          |
| Time 2                        | 1406.3          | 37.50     |        |          |
| Residual                      | 2287.4          | 47.83     |        |          |

| <b>Attention/Vigilance, Continuous Performance Test, mean reaction time</b> |                        |           |          |                |                        |           |          |                |
|-----------------------------------------------------------------------------|------------------------|-----------|----------|----------------|------------------------|-----------|----------|----------------|
| <i>Fixed effects</i>                                                        | <b>Siblings, n=947</b> |           |          |                | <b>Controls, n=552</b> |           |          |                |
|                                                                             | <i>Estimate</i>        | <i>SE</i> | <i>t</i> | <i>p-value</i> | <i>Estimate</i>        | <i>SE</i> | <i>t</i> | <i>p-value</i> |
| Intercept                                                                   | 404.4644               | 4.0972    | 98.505   | < 2e-16        | 413.9709               | 5.2818    | 78.106   | <0.001         |
| Smoking, yes                                                                | 2.1370                 | 3.9068    | 0.544    | 0.586412       | -2.4708                | 5.8945    | -0.416   | 0.6778         |
| Time 1                                                                      | 10.7900                | 3.1470    | 3.422    | 0.000649       | 5.5335                 | 4.2403    | 1.300    | 0.1940         |
| Time 2                                                                      | 7.0256                 | 4.1047    | 1.708    | 0.088000       | -7.5561                | 4.7855    | -1.571   | 0.1167         |
| Gender, female                                                              | 17.9449                | 4.5570    | 3.926    | 9.23e-05       | 14.4015                | 6.1774    | 2.320    | 0.0207         |
| Age                                                                         | 1.7453                 | 0.2722    | 6.393    | 2.53e-10       | 2.2615                 | 0.2842    | 7.920    | <0.001         |
| Cannabis, urine positive                                                    | 0.9006                 | 7.1493    | 0.125    | 0.900241       | 5.5060                 | 12.1470   | 0.449    | 0.6534         |
| Education                                                                   | -0.9598                | 0.4846    | -1.971   | 0.048932       | -0.1253                | 0.5773    | -0.215   | 0.8299         |
| CAPE, negative subscale                                                     | 7.8655                 | 6.4720    | 1.209    | 0.226986       | -12.8633               | 9.3617    | -1.361   | 0.1739         |
| Cape, positive subscale                                                     | -24.8571               | 10.9395   | -2.262   | 0.023844       | 35.7306                | 15.7201   | 2.252    | 0.0246         |

|                           |                 |           |       |          |                 |           |       |        |
|---------------------------|-----------------|-----------|-------|----------|-----------------|-----------|-------|--------|
| CAPE, depressive subscale | 1.7884          | 6.5760    | 0.270 | 0.786834 | 7.3586          | 8.4929    | 0.858 | 0.3910 |
| <i>Random effects</i>     | <i>Variance</i> | <i>SD</i> |       |          | <i>Variance</i> | <i>SD</i> |       |        |
| Subject Intercept         | 4062            | 63.74     |       |          | 4414.0          | 66.44     |       |        |
| Time 1                    | 1200            | 34.65     |       |          | 1448.2          | 38.05     |       |        |
| Time 2                    | 2673            | 51.70     |       |          | 870.1           | 29.50     |       |        |
| Residual                  | 1695            | 41.17     |       |          | 1685.7          | 41.06     |       |        |

| <b>Working memory, WAIS arithmetic, Total raw score (0-22)</b> |                 |           |          |                |
|----------------------------------------------------------------|-----------------|-----------|----------|----------------|
| <b>Patients n=930</b>                                          |                 |           |          |                |
| <i>Fixed effects</i>                                           | <i>Estimate</i> | <i>SE</i> | <i>t</i> | <i>p-value</i> |
| Intercept                                                      | 14.06719        | 0.41438   | 33.784   | < 2e-16        |
| Smoking, yes                                                   | -0.58901        | 0.25542   | -2.294   | 0.0220         |
| Time 1                                                         | -0.48726        | 0.21911   | -2.218   | 0.0268         |
| Time 2                                                         | -1.30367        | 0.24469   | -5.311   | 1.39e-07       |
| Gender, female                                                 | -2.16025        | 0.32557   | -6.615   | 6.23e-11       |
| Age                                                            | 0.01214         | 0.01880   | 0.644    | 0.5197         |
| Antipsychotic medication, yes                                  | -0.38733        | 0.35928   | -1.072   | 0.2840         |
| Cannabis, urine positive                                       | 0.43102         | 0.32673   | 1.312    | 0.1898         |
| Education                                                      | 0.24959         | 0.02911   | 8.522    | < 2e-16        |
| PANSS, negative subscale                                       | -0.82740        | 0.16673   | -4.933   | 9.03e-07       |
| PANSS, positive subscale                                       | -0.41278        | 0.19270   | -2.129   | 0.0334         |
| PANSS, general subscale                                        | -0.25868        | 0.32192   | -0.799   | 0.4246         |
| <i>Random effects</i>                                          | <i>Variance</i> | <i>SD</i> |          |                |
| Subject Intercept                                              | 11.636          | 3.411     |          |                |
| Time 1                                                         | 4.970           | 2.229     |          |                |
| Time 2                                                         | 2.491           | 1.578     |          |                |
| Residual                                                       | 6.925           | 2.632     |          |                |

| <b>Working memory, WAIS arithmetic, Total raw score (0-22)</b> |                        |           |          |                |                        |           |          |                |
|----------------------------------------------------------------|------------------------|-----------|----------|----------------|------------------------|-----------|----------|----------------|
| <i>Fixed effects</i>                                           | <b>Siblings, n=967</b> |           |          |                | <b>Controls, n=562</b> |           |          |                |
|                                                                | <i>Estimate</i>        | <i>SE</i> | <i>t</i> | <i>p-value</i> | <i>Estimate</i>        | <i>SE</i> | <i>t</i> | <i>p-value</i> |
| Intercept                                                      | 15.67515               | 0.21828   | 71.669   | < 2e-16        | 16.58802               | 0.27571   | 59.964   | <0.001         |
| Smoking, yes                                                   | -0.60089               | 0.20144   | -2.967   | 0.00304        | -0.38811               | 0.29908   | -1.287   | 0.199          |
| Time 1                                                         | 0.13301                | 0.15185   | 0.874    | 0.38237        | -0.33362               | 0.20227   | -1.642   | 0.101          |

|                           |                 |           |        |          |                 |           |        |        |
|---------------------------|-----------------|-----------|--------|----------|-----------------|-----------|--------|--------|
| Time 2                    | -0.4441         | 0.19754   | -2.244 | 0.02500  | -0.99912        | 0.24258   | -4.102 | <0.001 |
| Gender, female            | -2.09674        | 0.25830   | -8.096 | 1.63e-15 | -1.55274        | 0.33395   | -4.628 | <0.001 |
| Age                       | 0.02065         | 0.01545   | 1.333  | 0.18281  | 0.01585         | 0.01528   | 1.033  | 0.302  |
| Cannabis, urine positive  | -0.56929        | 0.37761   | -1.501 | 0.13363  | 0.06230         | 0.65263   | 0.095  | 0.925  |
| Education                 | 0.15761         | 0.02387   | 6.569  | 6.94e-11 | 0.17465         | 0.03021   | 5.724  | <0.001 |
| CAPE, negative subscale   | 0.80374         | 0.33131   | 2.413  | 0.01594  | 0.16389         | 0.46911   | 0.346  | 0.729  |
| Cape, positive subscale   | -1.12020        | 0.54173   | -2.057 | 0.03982  | -0.96731        | 0.77029   | -1.244 | 0.214  |
| CAPE, depressive subscale | -0.65680        | 0.33782   | -1.934 | 0.05331  | -0.13992        | 0.43561   | -0.318 | 0.750  |
| <i>Random effects</i>     | <i>Variance</i> | <i>SD</i> |        |          | <i>Variance</i> | <i>SD</i> |        |        |
| Subject Intercept         | 12.5019         | 3.5358    |        |          | 12.100          | 3.478     |        |        |
| Time 1                    | 0.4667          | 0.6684    |        |          | 1.148           | 1.072     |        |        |
| Time 2                    | 3.6177          | 1.9020    |        |          | 3.621           | 1.903     |        |        |
| Residual                  | 4.3672          | 2.0898    |        |          | 3.887           | 1.972     |        |        |

| <b>Verbal learning, AVLT, Immediate recall (0-45)</b> |                 |           |          |                |
|-------------------------------------------------------|-----------------|-----------|----------|----------------|
| <b>Patients n=929</b>                                 |                 |           |          |                |
| <i>Fixed effects</i>                                  | <i>Estimate</i> | <i>SE</i> | <i>t</i> | <i>p-value</i> |
| Intercept                                             | 25.21101        | 0.53891   | 46.556   | < 2e-16        |
| Smoking, yes                                          | 0.07453         | 0.33992   | 0.218    | 0.82742        |
| Time 1                                                | 1.63671         | 0.27098   | 6.025    | 2.59e-09       |
| Time 2                                                | 0.53851         | 0.33609   | 1.597    | 0.11054        |
| Gender, female                                        | 1.40042         | 0.43994   | 3.174    | 0.00155        |
| Age                                                   | -0.12374        | 0.02539   | -4.858   | 1.39e-06       |
| Antipsychotic medication, yes                         | -2.61767        | 0.45860   | -5.675   | 1.72e-08       |
| Cannabis, urine positive                              | -0.32193        | 0.43287   | -0.739   | 0.45972        |
| Education                                             | 0.20754         | 0.03901   | 5.289    | 1.41e-07       |
| PANSS, negative subscale                              | -0.48396        | 0.21721   | -2.215   | 0.02694        |
| PANSS, positive subscale                              | -0.54978        | 0.25586   | -2.136   | 0.03287        |
| PANSS, general subscale                               | -0.66726        | 0.42527   | -1.559   | 0.11918        |
| <i>Random effects</i>                                 | <i>Variance</i> | <i>SD</i> |          |                |
| Subject Intercept                                     | 22.359          | 4.729     |          |                |

|          |        |       |  |  |
|----------|--------|-------|--|--|
| Time 1   | 4.846  | 2.201 |  |  |
| Time 2   | 8.506  | 2.917 |  |  |
| Residual | 12.009 | 3.465 |  |  |

| <b>Verbal learning, AVLT, Immediate recall (0-45)</b> |                        |           |          |                |                        |           |          |                |
|-------------------------------------------------------|------------------------|-----------|----------|----------------|------------------------|-----------|----------|----------------|
| <i>Fixed effects</i>                                  | <b>Siblings, n=965</b> |           |          |                | <b>Controls, n=561</b> |           |          |                |
|                                                       | <i>Estimate</i>        | <i>SE</i> | <i>t</i> | <i>p-value</i> | <i>Estimate</i>        | <i>SE</i> | <i>t</i> | <i>p-value</i> |
| Intercept                                             | 26.56089               | 0.28812   | 91.997   | < 2e-16        | 27.38920               | 0.34628   | 78.809   | <0.001         |
| Smoking, yes                                          | -0.38208               | 0.28114   | -1.352   | 0.17648        | -0.72233               | 0.40337   | -1.776   | 0.075971       |
| Time 1                                                | 1.62037                | 0.23200   | 6.971    | 6.11e-12       | 1.27019                | 0.32076   | 3.945    | <0.001         |
| Time 2                                                | 1.68166                | 0.28204   | 5.949    | 3.64e-09       | 1.16338                | 0.33793   | 3.428    | <0.001         |
| Gender, female                                        | 1.29515                | 0.32750   | 3.944    | 8.59e-05       | 2.11655                | 0.40310   | 5.223    | <0.001         |
| Age                                                   | -0.11130               | 0.01954   | -5.680   | 1.78e-08       | -0.12651               | 0.01842   | -6.835   | <0.001         |
| Cannabis, urine positive                              | -0.52472               | 0.52793   | -0.989   | 0.32256        | -0.97774               | 0.87036   | -1.114   | 0.265561       |
| Education                                             | 0.22187                | 0.03428   | 6.440    | 1.54e-10       | 0.14096                | 0.04224   | 3.305    | <0.001         |
| CAPE, negative subscale                               | 0.20034                | 0.47421   | 0.420    | 0.67436        | -0.13999               | 0.66481   | -0.209   | 0.834757       |
| Cape, positive subscale                               | -2.22388               | 0.77781   | -2.845   | 0.00449        | -0.92594               | 1.08041   | -0.850   | 0.395736       |
| CAPE, depressive subscale                             | 0.28466                | 0.48358   | 0.586    | 0.55823        | -0.03243               | 0.61080   | -0.053   | 0.958050       |
| <i>Random effects</i>                                 | <i>Variance</i>        | <i>SD</i> |          |                | <i>Variance</i>        | <i>SD</i> |          |                |
| Subject Intercept                                     | 19.188                 | 4.380     |          |                | 15.946                 | 3.993     |          |                |
| Time 1                                                | 4.253                  | 2.062     |          |                | 7.740                  | 2.782     |          |                |
| Time 2                                                | 7.693                  | 2.774     |          |                | 3.884                  | 1.971     |          |                |
| Residual                                              | 10.440                 | 3.231     |          |                | 9.873                  | 3.142     |          |                |

| <b>Verbal learning, AVLT, Delayed recall (0-15)</b> |                       |           |          |                |
|-----------------------------------------------------|-----------------------|-----------|----------|----------------|
| <i>Fixed effects</i>                                | <b>Patients n=926</b> |           |          |                |
|                                                     | <i>Estimate</i>       | <i>SE</i> | <i>t</i> | <i>p-value</i> |
| Intercept                                           | 8.54152               | 0.25400   | 33.460   | < 2e-16        |
| Smoking, yes                                        | 0.05122               | 0.15993   | 0.318    | 0.750225       |
| Time 1                                              | 0.41602               | 0.13027   | 3.186    | 0.001499       |
| Time 2                                              | 0.10951               | 0.15609   | 0.699    | 0.484437       |
| Gender, female                                      | 0.75255               | 0.20803   | 3.607    | 0.000327       |



|                               |                 |           |        |          |
|-------------------------------|-----------------|-----------|--------|----------|
| Age                           | -0.02720        | 0.01200   | -2.261 | 0.024012 |
| Antipsychotic medication, yes | -1.21266        | 0.21590   | -5.583 | 2.89e-08 |
| Cannabis, urine positive      | 0.08608         | 0.20438   | 0.419  | 0.675494 |
| Education                     | 0.09317         | 0.01847   | 5.013  | 5.97e-07 |
| PANSS, negative subscale      | -0.20505        | 0.10225   | -1.993 | 0.046465 |
| PANSS, positive subscale      | -0.23710        | 0.12046   | -1.956 | 0.050678 |
| PANSS, general subscale       | -0.24198        | 0.20021   | -1.201 | 0.230056 |
| <i>Random effects</i>         | <i>Variance</i> | <i>SD</i> |        |          |
| Subject Intercept             | 5.259           | 2.293     |        |          |
| Time 1                        | 1.912           | 1.383     |        |          |
| Time 2                        | 2.188           | 1.479     |        |          |
| Residual                      | 2.461           | 1.569     |        |          |

| <b>Verbal learning, AVLT, Delayed recall (0-15)</b> |                        |           |          |                |                        |           |          |                |
|-----------------------------------------------------|------------------------|-----------|----------|----------------|------------------------|-----------|----------|----------------|
|                                                     | <b>Siblings, n=966</b> |           |          |                | <b>Controls, n=559</b> |           |          |                |
| <i>Fixed effects</i>                                | <i>Estimate</i>        | <i>SE</i> | <i>t</i> | <i>p-value</i> | <i>Estimate</i>        | <i>SE</i> | <i>t</i> | <i>p-value</i> |
| Intercept                                           | 9.124151               | 0.134283  | 67.807   | < 2e-16        | 9.059068               | 0.172263  | 52.401   | < 2e-16        |
| Smoking, yes                                        | -0.264589              | 0.129838  | -2.027   | 0.042765       | 0.013625               | 0.200268  | 0.067    | 0.94620        |
| Time 1                                              | 0.564195               | 0.110373  | 5.102    | 4.09e-07       | 0.395185               | 0.154238  | 2.552    | 0.01103        |
| Time 2                                              | 0.589210               | 0.126473  | 4.648    | 3.76e-06       | 0.546373               | 0.166178  | 3.274    | 0.00113        |
| Gender, female                                      | 0.708465               | 0.152432  | 4.635    | 4.05e-06       | 1.270315               | 0.200333  | 6.309    | <0.001         |
| Age                                                 | -0.035604              | 0.009101  | -3.902   | 0.000102       | -0.051067              | 0.009135  | -5.564   | <0.001         |
| Cannabis, urine positive                            | -0.083223              | 0.244112  | -0.339   | 0.734358       | -0.625248              | 0.431462  | -1.437   | 0.15100        |
| Education                                           | 0.085324               | 0.015835  | 5.362    | 9.35e-08       | 0.063856               | 0.020607  | 3.069    | 0.00222        |
| CAPE, negative subscale                             | 0.113924               | 0.220076  | 0.515    | 0.606701       | -0.467491              | 0.326436  | -1.419   | 0.15621        |
| Cape, positive subscale                             | -0.872051              | 0.360517  | -2.407   | 0.016182       | -0.977728              | 0.536281  | -1.807   | 0.07103        |
| CAPE, depressive subscale                           | 0.209871               | 0.223510  | 0.934    | 0.350429       | 0.421681               | 0.299429  | 1.395    | 0.16319        |
| <i>Random effects</i>                               | <i>Variance</i>        | <i>SD</i> |          |                | <i>Variance</i>        | <i>SD</i> |          |                |
| Subject Intercept                                   | 4.249                  | 2.061     |          |                | 4.070                  | 2.017     |          |                |
| Time 1                                              | 1.433                  | 1.197     |          |                | 1.374                  | 1.172     |          |                |

|          |       |       |  |  |       |       |  |  |
|----------|-------|-------|--|--|-------|-------|--|--|
| Time 2   | 1.042 | 1.021 |  |  | 1.145 | 1.070 |  |  |
| Residual | 2.226 | 1.492 |  |  | 2.295 | 1.515 |  |  |

| <b>Reasoning and problem solving, WAIS block design, Total raw score (0-68)</b> |                 |           |          |                |
|---------------------------------------------------------------------------------|-----------------|-----------|----------|----------------|
| <b>Patients n=929</b>                                                           |                 |           |          |                |
| <i>Fixed effects</i>                                                            | <i>Estimate</i> | <i>SE</i> | <i>t</i> | <i>p-value</i> |
| Intercept                                                                       | 44.95469        | 1.18468   | 37.769   | < 2e-16        |
| Smoking, yes                                                                    | -1.66310        | 0.78962   | -2.092   | 0.036580       |
| Time 1                                                                          | 1.41998         | 0.51855   | 2.730    | 0.006454       |
| Time 2                                                                          | 2.66746         | 0.78024   | 3.409    | 0.000678       |
| Gender, female                                                                  | -4.11172        | 1.24252   | -3.300   | 0.001001       |
| Age                                                                             | -0.26928        | 0.07193   | -3.733   | 0.000200       |
| Antipsychotic medication, yes                                                   | -2.23207        | 0.89491   | -2.478   | 0.013394       |
| Cannabis, urine positive                                                        | 0.84196         | 0.94954   | 0.881    | 0.378520       |
| Education                                                                       | 0.38990         | 0.08391   | 4.617    | 4.35e-06       |
| PANSS, negative subscale                                                        | -1.90246        | 0.46030   | -4.105   | 4.33e-05       |
| PANSS, positive subscale                                                        | -1.28408        | 0.53882   | -2.367   | 0.018107       |
| PANSS, general subscale                                                         | 0.77186         | 0.87176   | 0.879    | 0.379401       |
| <i>Random effects</i>                                                           | <i>Variance</i> | <i>SD</i> |          |                |
| Subject Intercept                                                               | 227.44          | 15.081    |          |                |
| Time 1                                                                          | 13.02           | 3.608     |          |                |
| Time 2                                                                          | 78.91           | 8.883     |          |                |
| Residual                                                                        | 32.44           | 5.696     |          |                |

| <b>Reasoning and problem solving, WAIS block design, Total raw score (0-68)</b> |                 |           |          |                |                        |           |          |                |
|---------------------------------------------------------------------------------|-----------------|-----------|----------|----------------|------------------------|-----------|----------|----------------|
| <b>Siblings, n=967</b>                                                          |                 |           |          |                | <b>Controls, n=562</b> |           |          |                |
| <i>Fixed effects</i>                                                            | <i>Estimate</i> | <i>SE</i> | <i>t</i> | <i>p-value</i> | <i>Estimate</i>        | <i>SE</i> | <i>t</i> | <i>p-value</i> |
| Intercept                                                                       | 47.6106         | 0.74445   | 63.833   | < 2e-16        | 47.31807               | 0.92838   | 50.801   | <0.001         |
|                                                                                 | 6               |           |          |                |                        |           |          |                |
| Smoking, yes                                                                    | -1.72685        | 0.61048   | -2.813   | 0.004969       | -1.92091               | 0.94125   | -2.022   | 0.0435         |
| Time 1                                                                          | 2.95875         | 0.44489   | 6.636    | 5.43e-11       | 3.00718                | 0.59777   | 5.008    | <0.001         |

|                           |                 |           |        |          |                 |           |        |        |
|---------------------------|-----------------|-----------|--------|----------|-----------------|-----------|--------|--------|
| Time 2                    | 5.76778         | 0.60055   | 9.581  | < 2e-16  | 4.60245         | 0.77802   | 5.891  | <0.001 |
| Gender, female            | -3.43068        | 0.88510   | -3.866 | 0.000118 | -1.65361        | 1.13737   | -1.448 | 0.1483 |
| Age                       | -0.23245        | 0.05306   | -4.370 | 1.37e-05 | -0.34411        | 0.05224   | -6.561 | <0.001 |
| Cannabis, urine positive  | 1.68253         | 1.15135   | 1.454  | 0.146100 | 1.10146         | 2.06853   | 0.527  | 0.5980 |
| Education                 | 0.32062         | 0.07247   | 4.401  | 1.16e-05 | 0.37323         | 0.09271   | 3.983  | <0.001 |
| CAPE, negative subscale   | 3.32067         | 0.98246   | 3.361  | 0.000798 | 1.28468         | 1.44432   | 0.880  | 0.3789 |
| Cape, positive subscale   | -1.32536        | 1.64068   | -0.804 | 0.421793 | -3.98439        | 2.41446   | -1.634 | 0.1026 |
| CAPE, depressive subscale | -2.29414        | 1.00453   | -2.271 | 0.023294 | -1.07230        | 1.33693   | -0.794 | 0.4276 |
| <i>Random effects</i>     | <i>Variance</i> | <i>SD</i> |        |          | <i>Variance</i> | <i>SD</i> |        |        |
| Subject Intercept         | 174.66          | 13.216    |        |          | 153.14          | 12.375    |        |        |
| Time 1                    | 2.65            | 1.628     |        |          | 17.56           | 4.190     |        |        |
| Time 2                    | 30.60           | 5.532     |        |          | 59.55           | 7.717     |        |        |
| Residual                  | 35.60           | 5.966     |        |          | 29.19           | 5.403     |        |        |

## Section 2

### Results of linear mixed models regarding the cross-sectional association between number of cigarettes and neurocognitive tasks.

| Effects                                                                     | <u>Patients</u> |      |        |     | <u>Siblings</u> |      |        |     | <u>Controls</u> |      |        |     |
|-----------------------------------------------------------------------------|-----------------|------|--------|-----|-----------------|------|--------|-----|-----------------|------|--------|-----|
|                                                                             | Estimate        | SE   | P      | N   | Estimate        | SE   | P      | N   | Estimate        | SE   | P      | N   |
| <u>Speed of processing, WAIS Digit Symbol Coding (0-133)</u>                |                 |      |        |     |                 |      |        |     |                 |      |        |     |
| Intercept                                                                   | 69.37           | 1.30 | <0.001 | 921 |                 |      |        |     | 80.36           | 0.95 | <0.001 | 561 |
| Cigs/day                                                                    | -0.10           | 0.03 | 0.002  |     |                 |      |        |     | -0.25           | 0.07 | 0.001  |     |
| <u>Attention/Vigilance, Continuous Performance Test, Accuracy (0-100)</u>   |                 |      |        |     |                 |      |        |     |                 |      |        |     |
| Intercept                                                                   |                 |      |        |     |                 |      |        |     |                 |      |        |     |
| Cigs/day                                                                    |                 |      |        |     |                 |      |        |     |                 |      |        |     |
| <u>Attention/Vigilance, Continuous Performance Test, Mean reaction time</u> |                 |      |        |     |                 |      |        |     |                 |      |        |     |
| Intercept                                                                   |                 |      |        |     |                 |      |        |     |                 |      |        |     |
| No. of cigs                                                                 |                 |      |        |     |                 |      |        |     |                 |      |        |     |
| <u>Working memory, WAIS Arithmetic (0-22)</u>                               |                 |      |        |     |                 |      |        |     |                 |      |        |     |
| Intercept                                                                   |                 |      |        |     | 15.60           | 0.22 | <0.001 | 964 |                 |      |        |     |
| No. of cigs                                                                 |                 |      |        |     | -0.30           | 0.01 | 0.026  |     |                 |      |        |     |
| <u>Verbal learning, AVLT immediate recall (0-45)</u>                        |                 |      |        |     |                 |      |        |     |                 |      |        |     |
| Intercept                                                                   |                 |      |        |     |                 |      |        |     |                 |      |        |     |
| No. of cigs                                                                 |                 |      |        |     |                 |      |        |     |                 |      |        |     |
| <u>Verbal learning, AVLT delayed recall (0-45)</u>                          |                 |      |        |     |                 |      |        |     |                 |      |        |     |
| Intercept                                                                   |                 |      |        |     | 9.10            | 0.13 | <0.001 | 962 |                 |      |        |     |
| No. of cigs                                                                 |                 |      |        |     | -0.01           | 0.01 | 0.171  |     |                 |      |        |     |
| <u>Reasoning and Problem solving, WAIS Block Design (0-68)</u>              |                 |      |        |     |                 |      |        |     |                 |      |        |     |
| Intercept                                                                   | 44.68           | 1.14 | <0.001 | 922 | 47.62           | 0.74 | <0.001 | 964 | 47.38           | 0.92 | <0.001 | 561 |
| No. of cigs                                                                 | -0.05           | 0.03 | .086   |     | -0.13           | 0.04 | 0.002  |     | -0.14           | 0.07 | 0.03   |     |

## Section 3

### Results of linear mixed models regarding the association between change in smoking status and change in performance of neurocognitive tasks.

| Effects                                                                     | <u>Patients</u> |       |        |     | <u>Siblings</u> |      |        |     | <u>Controls</u> |       |        |     |
|-----------------------------------------------------------------------------|-----------------|-------|--------|-----|-----------------|------|--------|-----|-----------------|-------|--------|-----|
|                                                                             | Estimate        | SE    | P      | N   | Estimate        | SE   | P      | N   | Estimate        | SE    | P      | N   |
| <u>Speed of processing, WAIS Digit Symbol Coding (0-133)</u>                |                 |       |        |     |                 |      |        |     |                 |       |        |     |
| Intercept                                                                   | 5.52            | 1.48  | <0.001 | 517 | 4.13            | 0.59 | <0.001 | 891 | 2.89            | 0.93  | 0.002  | 278 |
| Ceased smoking                                                              | 4.90            | 1.73  | 0.005  |     | 0.61            | 1.13 | 0.592  |     | -0.11           | 2.15  | 0.960  |     |
| Started smoking                                                             | -2.15           | 2.23  | 0.340  |     | 0.29            | 1.32 | 0.829  |     | -3.01           | 2.59  | 0.247  |     |
| <u>Attention/Vigilance, Continuous Performance Test, accuracy (0-100)</u>   |                 |       |        |     |                 |      |        |     |                 |       |        |     |
| Intercept                                                                   | 0.48            | 0.43  | 0.260  | 583 | 0.28            | 0.19 | 0.141  | 656 | -0.35           | 0.21  | 0.090  | 372 |
| Ceased smoking                                                              | 0.13            | 0.46  | 0.774  |     | -0.09           | 0.33 | 0.788  |     | 0.04            | 0.52  | 0.925  |     |
| Started smoking                                                             | 0.12            | 0.60  | 0.841  |     | -0.08           | 0.39 | 0.836  |     | 0.30            | 0.60  | 0.618  |     |
| <u>Attention/Vigilance, Continuous Performance Test, mean reaction time</u> |                 |       |        |     |                 |      |        |     |                 |       |        |     |
| Intercept                                                                   | 19.68           | 8.12  | 0.016  | 583 | 11.72           | 3.73 | 0.002  | 655 | 8.74            | 4.96  | 0.080  | 372 |
| Ceased smoking                                                              | 1.30            | 9.88  | 0.191  |     | 0.89            | 7.22 | 0.968  |     | 7.02            | 10.88 | 0.522  |     |
| Started smoking                                                             | -2.34           | 12.95 | 0.072  |     | 2.57            | 8.65 | 0.767  |     | 10.64           | 13.79 | 0.444  |     |
| <u>Working memory, WAIS Arithmetic (0-22)</u>                               |                 |       |        |     |                 |      |        |     |                 |       |        |     |
| Intercept                                                                   | 0.38            | 0.45  | 0.393  | 516 | 0.36            | 0.17 | 0.029  | 587 | -0.13           | 0.22  | 0.551  | 278 |
| Ceased smoking                                                              | -0.70           | 0.53  | 0.185  |     | -0.15           | 0.33 | 0.666  |     | -0.56           | 0.55  | 0.314  |     |
| Started smoking                                                             | -1.40           | 0.68  | 0.041  |     | 0.15            | 0.39 | 0.701  |     | 1.48            | 0.64  | 0.022  |     |
| <u>Verbal learning, AVLT Immediate recall (0-45)</u>                        |                 |       |        |     |                 |      |        |     |                 |       |        |     |
| Intercept                                                                   | 3.87            | 0.62  | <0.001 | 515 | 2.03            | 0.27 | <0.001 | 592 | 1.51            | 0.37  | <0.001 | 277 |
| Ceased smoking                                                              | 0.53            | 0.72  | 0.462  |     | -0.40           | 0.53 | 0.450  |     | 0.14            | 0.86  | 0.869  |     |
| Started smoking                                                             | 0.71            | 0.94  | 0.452  |     | -0.74           | 0.61 | 0.230  |     | -0.23           | 1.01  | 0.824  |     |
| <u>Verbal learning, AVLT Delayed recall (0-45)</u>                          |                 |       |        |     |                 |      |        |     |                 |       |        |     |
| Intercept                                                                   | 1.45            | 0.30  | <0.001 | 512 | 0.63            | 0.13 | <0.001 | 584 | 0.71            | 0.18  | <0.001 | 276 |
| Ceased smoking                                                              | -0.37           | 0.34  | 0.284  |     | 0.05            | 0.24 | 0.829  |     | -0.51           | 0.44  | 0.256  |     |

|                 |       |      |       |  |       |      |       |      |      |       |
|-----------------|-------|------|-------|--|-------|------|-------|------|------|-------|
| Started smoking | -0.05 | 0.45 | 0.906 |  | -0.39 | 0.28 | 0.167 | 0.82 | 0.51 | 0.111 |
|-----------------|-------|------|-------|--|-------|------|-------|------|------|-------|

Reasoning and Problem solving, WAIS Block Design (0-68)

|                 |      |      |       |     |      |      |        |      |      |        |     |
|-----------------|------|------|-------|-----|------|------|--------|------|------|--------|-----|
| Intercept       | 2.77 | 1.06 | 0.009 | 513 | 3.47 | 0.47 | <0.001 | 3.03 | 0.72 | <0.001 | 278 |
| Ceased smoking  | 1.93 | 1.33 | 0.151 |     | 0.80 | 0.95 | 0.399  | 0.03 | 1.72 | 0.988  |     |
| Started smoking | 0.92 | 1.72 | 0.596 |     | 1.46 | 1.13 | 0.197  | 0.81 | 2.04 | 0.693  |     |

---

Abbreviations: WAIS= Wechsler Adult Intelligence Scale; AVLT= Auditory Verbal Learning Test.

## Section 4

Results of linear mixed models regarding the association between change in smoking status and change in neurocognitive outcomes.

| <i>Speed of processing , WAIS digit symbol coding, raw change score</i> |                 |           |          |                |
|-------------------------------------------------------------------------|-----------------|-----------|----------|----------------|
| <i>Patients n=517</i>                                                   |                 |           |          |                |
| <i>Fixed effects</i>                                                    | <i>Estimate</i> | <i>SE</i> | <i>t</i> | <i>p-value</i> |
| Intercept                                                               | 5.523186        | 1.484439  | 3.706    | 0.000229       |
| Smoking, quit                                                           | 4.901402        | 1.731217  | 2.814    | 0.005053       |
| Smoking, started                                                        | -2.146612       | 2.233497  | -0.956   | 0.339679       |
| Time 2                                                                  | -3.498907       | 1.145470  | -3.052   | 0.002392       |
| Gender, female                                                          | -0.252586       | 0.909742  | -0.276   | 0.782434       |
| Age                                                                     | -0.216389       | 0.051216  | -4.206   | 3.37e-05       |
| Antipsychotic medication, yes                                           | -2.962062       | 1.493131  | -1.974   | 0.048772       |
| Cannabis, urine positive                                                | -0.826331       | 1.178056  | -0.698   | 0.485683       |
| Education                                                               | 0.003568        | 0.107446  | 0.033    | 0.973665       |
| PANSS, negative subscale                                                | -0.616166       | 0.681366  | -0.899   | 0.368888       |
| PANSS, positive subscale                                                | 0.347047        | 0.877304  | 0.393    | 0.694205       |
| PANSS, general subscale                                                 | -1.733190       | 1.472475  | -1.170   | 0.242412       |
| <i>Random effects</i>                                                   | <i>Variance</i> | <i>SD</i> |          |                |
| Subject Intercept                                                       | 110.73          | 10.52     |          |                |
| Time 2                                                                  | 386.06          | 19.65     |          |                |
| Residual                                                                | 72.77           | 8.53      |          |                |

| <i>Speed of processing , WAIS digit symbol coding, raw change score</i> |                 |           |          |                |                        |           |          |                |
|-------------------------------------------------------------------------|-----------------|-----------|----------|----------------|------------------------|-----------|----------|----------------|
| <i>Siblings, n=891</i>                                                  |                 |           |          |                | <i>Controls, n=278</i> |           |          |                |
| <i>Fixed effects</i>                                                    | <i>Estimate</i> | <i>SE</i> | <i>t</i> | <i>p-value</i> | <i>Estimate</i>        | <i>SE</i> | <i>t</i> | <i>p-value</i> |
| Intercept                                                               | 4.12829         | 0.58967   | 6.992    | 5.77e-12       | 2.88892                | 0.92531   | 3.114    | 0.00200        |
| Smoking, quit                                                           | 0.60943         | 1.13166   | 0.536    | 0.59193        | -0.11017               | 2.15272   | -0.051   | 0.95955        |
| Smoking, started                                                        | 0.28648         | 1.32163   | 0.216    | 0.82917        | -3.01951               | 2.58711   | -1.158   | 0.24745        |
| Time 2                                                                  | -3.38540        | 0.78195   | -4.327   | 1.77e-05       | -3.34552               | 1.23797   | -2.699   | 0.00738        |

|                           |                 |           |        |         |                 |           |        |         |
|---------------------------|-----------------|-----------|--------|---------|-----------------|-----------|--------|---------|
| Gender, female            | -0.34787        | 0.56671   | -0.612 | 0.54081 | -0.13381        | 0.96563   | -0.138 | 0.89060 |
| Age                       | -0.09389        | 0.03495   | -2.679 | 0.00765 | -0.12887        | 0.04619   | -2.772 | 0.00604 |
| Cannabis, urine positive  | 1.35639         | 1.29508   | 1.043  | 0.29713 | 3.03678         | 2.37479   | 1.270  | 0.20534 |
| Education                 | -0.17841        | 0.08227   | -2.161 | 0.03112 | -0.06211        | 0.12971   | -0.475 | 0.63519 |
| CAPE, negative subscale   | -0.29092        | 1.15609   | -0.251 | 0.80212 | -1.47727        | 2.30358   | -0.636 | 0.52511 |
| CAPE, positive subscale   | -2.16014        | 1.82143   | -1.182 | 0.23775 | -5.95615        | 4.28839   | -1.378 | 0.16932 |
| CAPE, depressive subscale | 2.27531         | 1.20306   | 1.884  | 0.06003 | 1.32829         | 2.11738   | 0.622  | 0.53426 |
| <i>Random effects</i>     | <i>Variance</i> | <i>SD</i> |        |         | <i>Variance</i> | <i>SD</i> |        |         |
| Subject Intercept         | 65.81           | 8.112     |        |         | 68.98           | 8.305     |        |         |
| Time 2                    | 180.25          | 13.426    |        |         | 186.35          | 13.651    |        |         |
| Residual                  | 55.33           | 7.439     |        |         | 76.01           | 8.719     |        |         |

| <b>Attention/Vigilance, Continuous Performance Test, accuracy change score</b> |                 |           |          |                |
|--------------------------------------------------------------------------------|-----------------|-----------|----------|----------------|
| <b>Patients n= 583</b>                                                         |                 |           |          |                |
| <i>Fixed effects</i>                                                           | <i>Estimate</i> | <i>SE</i> | <i>t</i> | <i>p-value</i> |
| Intercept                                                                      | 0.48117         | 0.42512   | 1.127    | 0.2602         |
| Smoking, quit                                                                  | 0.13283         | 0.45958   | 0.287    | 0.7740         |
| Smoking, started                                                               | 0.12017         | 0.59596   | 0.200    | 0.8412         |
| Time 2                                                                         | -0.19154        | 0.36098   | -0.530   | 0.5960         |
| Gender, female                                                                 | 0.02872         | 0.22368   | 0.128    | 0.8984         |
| Age                                                                            | -0.01043        | 0.01278   | -0.812   | 0.4174         |
| Antipsychotic medication, yes                                                  | -0.13415        | 0.40679   | -0.328   | 0.7431         |
| Cannabis, urine positive                                                       | -0.50718        | 0.29835   | -1.691   | 0.0918         |
| Education                                                                      | -0.01525        | 0.02810   | -0.540   | 0.5896         |
| PANSS, negative subscale                                                       | 0.03011         | 0.17236   | 0.174    | 0.8622         |
| PANSS, positive subscale                                                       | -0.31899        | 0.22338   | -1.420   | 0.1564         |
| PANSS, general subscale                                                        | 0.42189         | 0.37767   | 1.111    | 0.2674         |



| <i>Random effects</i> | <i>Variance</i> | <i>SD</i> |  |  |
|-----------------------|-----------------|-----------|--|--|
| Subject Intercept     | 21.483          | 4.635     |  |  |
| Time 2                | 60.473          | 7.776     |  |  |
| Residual              | 3.692           | 1.921     |  |  |

| <b>Attention/Vigilance, Continuous Performance Test, accuracy change score</b> |                        |           |          |                |                        |           |          |                |
|--------------------------------------------------------------------------------|------------------------|-----------|----------|----------------|------------------------|-----------|----------|----------------|
| <i>Fixed effects</i>                                                           | <b>Siblings, n=656</b> |           |          |                | <b>Controls, n=372</b> |           |          |                |
|                                                                                | <i>Estimate</i>        | <i>SE</i> | <i>t</i> | <i>p-value</i> | <i>Estimate</i>        | <i>SE</i> | <i>t</i> | <i>p-value</i> |
| Intercept                                                                      | 0.283257               | 0.192235  | 1.472    | 0.141          | -0.35142               | 0.20604   | -1.700   | 0.0899         |
| Smoking, quit                                                                  | -0.088608              | 0.328273  | -0.269   | 0.788          | 0.04959                | 0.52220   | 0.094    | 0.9249         |
| Smoking, started                                                               | -0.081915              | 0.394713  | -0.207   | 0.836          | 0.30298                | 0.60377   | 0.499    | 0.6182         |
| Time 2                                                                         | -0.234262              | 0.236618  | -0.990   | 0.323          | 0.33189                | 0.35677   | 0.929    | 0.3533         |
| Gender, female                                                                 | -0.181960              | 0.162476  | -1.117   | 0.265          | 0.09595                | 0.22466   | 0.425    | 0.6715         |
| Age                                                                            | 0.011531               | 0.009923  | 1.159    | 0.247          | -0.01757               | 0.01045   | -1.671   | 0.0959         |
| Cannabis, urine positive                                                       | 0.109280               | 0.372373  | 0.292    | 0.770          | 0.16945                | 0.54520   | 0.309    | 0.7576         |
| Education                                                                      | 0.029398               | 0.023518  | 1.246    | 0.213          | -0.01381               | 0.03460   | -0.396   | 0.6921         |
| CAPE, negative subscale                                                        | -0.539042              | 0.326133  | -1.647   | 0.100          | -0.34528               | 0.55802   | -0.615   | 0.5393         |
| CAPE, positive subscale                                                        | 0.079537               | 0.616974  | 0.128    | 0.898          | 0.19836                | 106.128   | 0.186    | 0.8528         |
| CAPE, depressive subscale                                                      | 0.431732               | 0.331351  | 1.298    | 0.195          | 0.16034                | 0.50804   | 0.314    | 0.7541         |
| <i>Random effects</i>                                                          | <i>Variance</i>        | <i>SD</i> |          |                | <i>Variance</i>        | <i>SD</i> |          |                |
| Subject Intercept                                                              | 11.821                 | 3.438     |          |                | 3.749                  | 1.936     |          |                |
| Time 2                                                                         | 23.624                 | 4.860     |          |                | 30.346                 | 5.509     |          |                |
| Residual                                                                       | 3.529                  | 1.879     |          |                | 4.030                  | 2.015     |          |                |

| <b>Attention/Vigilance, Continuous Performance Test, mean reaction time change score</b> |                       |           |          |                |
|------------------------------------------------------------------------------------------|-----------------------|-----------|----------|----------------|
| <i>Fixed effects</i>                                                                     | <b>Patients n=583</b> |           |          |                |
|                                                                                          | <i>Estimate</i>       | <i>SE</i> | <i>t</i> | <i>p-value</i> |
| Intercept                                                                                | 19.6810               | 8.1235    | 2.414    | 0.0160         |
| Smoking, quit                                                                            | 1.30070               | 9.8794    | 1.309    | 0.1908         |
| Smoking, started                                                                         | -2.34145              | 12.9496   | -1.798   | 0.0726         |

|                               |                 |           |        |        |
|-------------------------------|-----------------|-----------|--------|--------|
| Time 2                        | -1.05012        | 5.8974    | -1.779 | 0.0758 |
| Gender, female                | -5.0013         | 5.4100    | -0.920 | 0.3580 |
| Age                           | 0.1337          | 0.3154    | 0.422  | 0.6732 |
| Antipsychotic medication, yes | -12.8588        | 8.2241    | -1.557 | 0.1200 |
| Cannabis, urine positive      | -2.4076         | 7.0906    | -0.338 | 0.7356 |
| Education                     | -0.3127         | 0.6654    | -0.468 | 0.6403 |
| PANSS, negative subscale      | -0.7720         | 3.9301    | -0.195 | 0.8451 |
| PANSS, positive subscale      | 3.8832          | 5.0421    | 0.766  | 0.4439 |
| PANSS, general subscale       | -6.7240         | 8.4907    | -0.788 | 0.4311 |
| <i>Random effects</i>         | <i>Variance</i> | <i>SD</i> |        |        |
| Subject Intercept             | 2582            | 50.81     |        |        |
| Time 2                        | 8812            | 93.87     |        |        |
| Residual                      | 3038            | 55.12     |        |        |

| <b>Attention/Vigilance, Continuous Performance Test, mean reaction time change score</b> |                        |           |          |                |                        |           |          |                |
|------------------------------------------------------------------------------------------|------------------------|-----------|----------|----------------|------------------------|-----------|----------|----------------|
| <i>Fixed effects</i>                                                                     | <b>Siblings, n=655</b> |           |          |                | <b>Controls, n=372</b> |           |          |                |
|                                                                                          | <i>Estimate</i>        | <i>SE</i> | <i>t</i> | <i>p-value</i> | <i>Estimate</i>        | <i>SE</i> | <i>t</i> | <i>p-value</i> |
| Intercept                                                                                | 11.7219                | 3.7264    | 3.141    | 0.001747       | 8.7380                 | 4.9637    | 1.756    | 0.0799         |
| Smoking, quitte                                                                          | 0.2866                 | 7.2217    | 0.040    | 0.968482       | 7.0244                 | 10.8799   | 0.641    | 0.5219         |
| Smoking, started                                                                         | 2.5705                 | 8.6506    | 0.296    | 0.767317       | 10.6421                | 13.7899   | 0.766    | 0.4439         |
| Time 2                                                                                   | -16.0877               | 4.7398    | -3.392   | 0.000734       | -11.7717               | 6.2913    | -1.869   | 0.0623         |
| Gender, female                                                                           | 0.8328                 | 3.7571    | 0.221    | 0.825177       | 1.6494                 | 4.8645    | 0.337    | 0.7364         |
| Age                                                                                      | 0.4026                 | 0.2301    | 1.744    | 0.081671       | -0.1082                | 0.2237    | -0.481   | 0.6312         |
| Cannabis, urine positive                                                                 | 15.5800                | 8.3695    | 1.855    | 0.064031       | 6.0958                 | 11.8602   | 0.511    | 0.6100         |
| Education                                                                                | -0.4963                | 0.5402    | -0.916   | 0.360264       | -0.4084                | 0.6723    | -0.603   | 0.5468         |
| CAPE, negative subscale                                                                  | 3.4922                 | 7.5383    | 0.462    | 0.644551       | 1.9755                 | 11.9244   | 0.165    | 0.8694         |
| CAPE, positive subscale                                                                  | -20.2363               | 13.5560   | -1.488   | 0.137264       | 7.0131                 | 22.7128   | 0.307    | 0.7593         |
| CAPE, depressive subscale                                                                | 2.7178                 | 7.6832    | 0.352    | 0.724624       | 0.2904                 | 10.9612   | 0.026    | 0.9790         |
| <i>Random effects</i>                                                                    | <i>Variance</i>        | <i>SD</i> |          |                | <i>Variance</i>        | <i>SD</i> |          |                |
| Subject Intercept                                                                        | 1893                   | 43.51     |          |                | 2734                   | 52.29     |          |                |
| Time 2                                                                                   | 5716                   | 75.61     |          |                | 7198                   | 84.84     |          |                |
| Residual                                                                                 | 2795                   | 52.87     |          |                | 2205                   | 46.96     |          |                |

| <b>Working memory, WAIS arithmetic, raw change score</b> |                       |           |          |                |
|----------------------------------------------------------|-----------------------|-----------|----------|----------------|
| <i>Fixed effects</i>                                     | <b>Patients n=516</b> |           |          |                |
|                                                          | <i>Estimate</i>       | <i>SE</i> | <i>t</i> | <i>p-value</i> |
| Intercept                                                | 0.38239               | 0.44537   | 0.855    | 0.39276        |
| Smoking, quitte                                          | -0.70040              | 0.52518   | -1.326   | 0.18546        |
| Smoking, started                                         | -1.40364              | 0.68206   | -2.047   | 0.04121        |
| Time 2                                                   | -0.56501              | 0.37357   | -1.511   | 0.13136        |
| Gender, female                                           | 0.17260               | 0.26844   | 0.640    | 0.52261        |

|                               |                 |           |        |         |
|-------------------------------|-----------------|-----------|--------|---------|
| Age                           | -0.04747        | 0.01524   | -3.100 | 0.00211 |
| Antipsychotic medication, yes | 0.01883         | 0.44773   | 0.042  | 0.96662 |
| Cannabis, urine positive      | -0.06772        | 0.35251   | -0.191 | 0.84852 |
| Education                     | -0.05730        | 0.03237   | -1.761 | 0.07907 |
| PANSS, negative subscale      | -0.05335        | 0.20718   | -0.256 | 0.79796 |
| PANSS, positive subscale      | -0.18405        | 0.26433   | -0.693 | 0.48900 |
| PANSS, general subscale       | -0.32834        | 0.44653   | -0.731 | 0.46503 |
| <i>Random effects</i>         | <i>Variance</i> | <i>SD</i> |        |         |
| Subject Intercept             | 10.872          | 3.297     |        |         |
| Time 2                        | 45.532          | 6.748     |        |         |
| Residual                      | 6.041           | 2.458     |        |         |

| <b>Working memory, WAIS arithmetic, raw change score</b> |                        |           |          |                |                        |           |          |                |
|----------------------------------------------------------|------------------------|-----------|----------|----------------|------------------------|-----------|----------|----------------|
|                                                          | <b>Siblings, n=587</b> |           |          |                | <b>Controls, n=278</b> |           |          |                |
| <i>Fixed effects</i>                                     | <i>Estimate</i>        | <i>SE</i> | <i>t</i> | <i>p-value</i> | <i>Estimate</i>        | <i>SE</i> | <i>t</i> | <i>p-value</i> |
| Intercept                                                | 0.36466                | 0.16636   | 2.189    | 0.02890        | -0.13397               | 0.22404   | -0.596   | 0.5513         |
| Smoking, quit                                            | -0.14569               | 0.33418   | -0.434   | 0.66425        | -0.55716               | 0.54867   | -1.007   | 0.3144         |
| Smoking, started                                         | 0.15187                | 0.39397   | 0.384    | 0.70118        | 1.48409                | 0.63846   | 2.308    | 0.0216         |
| Time 2                                                   | -0.69249               | 0.25591   | -2.704   | 0.00704        | -0.38610               | 0.34933   | -1.104   | 0.2706         |
| Gender, female                                           | 0.20666                | 0.16435   | 1.254    | 0.21058        | 0.14042                | 0.23690   | 0.589    | 0.5564         |
| Age                                                      | -0.01607               | 0.01009   | -1.588   | 0.11300        | -0.02702               | 0.01132   | -2.372   | 0.0185         |
| Cannabis, urine positive                                 | 0.81048                | 0.37517   | 2.153    | 0.03174        | 0.05663                | 0.58273   | 0.097    | 0.9232         |
| Education                                                | -0.04925               | 0.02412   | -2.035   | 0.04235        | 0.02117                | 0.03390   | 0.620    | 0.5360         |
| CAPE, negative subscale                                  | -0.16458               | 0.34175   | -0.480   | 0.63151        | 0.13914                | 0.57174   | 0.242    | 0.8093         |
| CAPE, positive subscale                                  | -0.25682               | 0.52963   | -0.483   | 0.62907        | -0.15248               | 1.06670   | -0.142   | 0.8873         |
| CAPE, depressive subscale                                | 0.14441                | 0.35809   | 0.402    | 0.68797        | -0.26790               | 0.52922   | -0.502   | 0.6158         |
| <i>Random effects</i>                                    | <i>Variance</i>        | <i>SD</i> |          |                | <i>Variance</i>        | <i>SD</i> |          |                |
| Subject Intercept                                        | 4.210                  | 2.052     |          |                | 3.989                  | 1.997     |          |                |
| Time 2                                                   | 21.114                 | 4.595     |          |                | 18.549                 | 4.307     |          |                |
| Residual                                                 | 4.959                  | 2.227     |          |                | 4.399                  | 2.097     |          |                |

| <b>Verbal learning, AVLT, Immediate recall change score</b> |                 |           |          |                |
|-------------------------------------------------------------|-----------------|-----------|----------|----------------|
| <b>Patients n=515</b>                                       |                 |           |          |                |
| <i>Fixed effects</i>                                        | <i>Estimate</i> | <i>SE</i> | <i>t</i> | <i>p-value</i> |
| Intercept                                                   | 3.87496         | 0.61697   | 6.258    | 7.11e-10       |
| Smoking, quit                                               | 0.53191         | 0.71835   | 0.736    | 0.46195        |
| Smoking, started                                            | 0.71006         | 0.93871   | 0.752    | 0.45226        |
| Time 2                                                      | -3.73624        | 0.44784   | -8.334   | 7.61e-16       |
| Gender, female                                              | -0.15799        | 0.39570   | -0.397   | 0.69126        |
| Age                                                         | -0.03049        | 0.02247   | -1.351   | 0.17759        |
| Antipsychotic medication, yes                               | -1.9063         | 0.62492   | -3.124   | 0.00186        |
| Cannabis, urine positive                                    | 0.47527         | 0.51088   | 0.926    | 0.35521        |
| Education                                                   | 0.02463         | 0.04629   | 0.529    | 0.59688        |
| PANSS, negative subscale                                    | -0.25099        | 0.29014   | -0.860   | 0.38994        |
| PANSS, positive subscale                                    | 0.01043         | 0.37539   | 0.028    | 0.97797        |
| PANSS, general subscale                                     | -0.62910        | 0.62289   | -1.004   | 0.31569        |
| <i>Random effects</i>                                       | <i>Variance</i> | <i>SD</i> |          |                |
| Subject Intercept                                           | 16.91           | 4.113     |          |                |
| Time 2                                                      | 51.93           | 7.206     |          |                |
| Residual                                                    | 12.31           | 3.509     |          |                |

| <b>Verbal learning, AVLT, Immediate recall change score</b> |                        |           |          |                |                        |           |          |                |
|-------------------------------------------------------------|------------------------|-----------|----------|----------------|------------------------|-----------|----------|----------------|
| <i>Fixed effects</i>                                        | <b>Siblings, n=592</b> |           |          |                | <b>Controls, n=277</b> |           |          |                |
|                                                             | <i>Estimate</i>        | <i>SE</i> | <i>t</i> | <i>p-value</i> | <i>Estimate</i>        | <i>SE</i> | <i>t</i> | <i>p-value</i> |
| Intercept                                                   | 2.03009                | 0.27309   | 7.424    | 2.95e-13       | 1.51346                | 0.37030   | 4.078    | 5.58e-05       |
| Smoking, quit                                               | -0.40205               | 0.52933   | -0.756   | 0.44964        | 0.14253                | 0.85504   | 0.165    | 0.8688         |
| Smoking, started                                            | -0.74158               | 0.61410   | -1.202   | 0.22954        | -0.22719               | 1.01341   | -0.222   | 0.8241         |
| Time 2                                                      | -1.99676               | 0.38487   | -5.185   | 2.94e-07       | -1.45348               | 0.57334   | -2.533   | 0.0119         |
| Gender, female                                              | -0.07921               | 0.26045   | -0.303   | 0.76186        | -0.65375               | 0.35046   | -1.853   | 0.0652         |
| Age                                                         | -0.03459               | 0.01599   | -2.157   | 0.03150        | -0.04293               | 0.01665   | -2.563   | 0.0111         |

|                           |                 |           |        |         |                 |           |        |        |
|---------------------------|-----------------|-----------|--------|---------|-----------------|-----------|--------|--------|
| Cannabis, urine positive  | -0.62959        | 0.59912   | -1.047 | 0.29548 | 0.60740         | 0.86016   | 0.701  | 0.4838 |
| Education                 | 0.10975         | 0.03790   | 2.886  | 0.00406 | 0.01241         | 0.04924   | 0.250  | 0.8028 |
| CAPE, negative subscale   | -0.11157        | 0.52937   | -0.210 | 0.83374 | 0.27724         | 0.85032   | 0.324  | 0.7465 |
| CAPE, positive subscale   | -1.47952        | 0.84051   | -1.755 | 0.07996 | -3.37761        | 1.57093   | -2.135 | 0.0339 |
| CAPE, depressive subscale | 0.34081         | 0.55572   | 0.611  | 0.54141 | 1.11867         | 0.79532   | 1.396  | 0.1640 |
| <i>Random effects</i>     | <i>Variance</i> | <i>SD</i> |        |         | <i>Variance</i> | <i>SD</i> |        |        |
| Subject Intercept         | 12.89           | 3.591     |        |         | 15.705          | 3.963     |        |        |
| Time 2                    | 45.47           | 6.743     |        |         | 58.048          | 7.619     |        |        |
| Residual                  | 13.03           | 3.610     |        |         | 9.837           | 3.136     |        |        |

| <b>Verbal learning, AVLT, Delayed recall change score</b> |                 |           |          |                |
|-----------------------------------------------------------|-----------------|-----------|----------|----------------|
| <b>Patients n=512</b>                                     |                 |           |          |                |
| <i>Fixed effects</i>                                      | <i>Estimate</i> | <i>SE</i> | <i>t</i> | <i>p-value</i> |
| Intercept                                                 | 1.450691        | 0.298218  | 4.846    | 1.58e-06       |
| Smoking, quit                                             | -0.368193       | 0.341140  | -1.073   | 0.2838         |
| Smoking, started                                          | -0.053523       | 0.448358  | -0.119   | 0.9056         |
| Time 2                                                    | -1.019370       | 0.208550  | -4.883   | 1.41e-06       |
| Gender, female                                            | -0.321603       | 0.191998  | -1.667   | 0.0963         |
| Age                                                       | -0.019388       | 0.010865  | -1.776   | 0.0765         |
| Antipsychotic medication, yes                             | -0.693536       | 0.302336  | -2.284   | 0.0227         |
| Cannabis, urine positive                                  | 0.008898        | 0.247581  | 0.036    | 0.9715         |
| Education                                                 | 0.002143        | 0.022216  | 0.096    | 0.9236         |
| PANSS, negative subscale                                  | -0.243758       | 0.140479  | -1.726   | 0.0850         |
| PANSS, positive subscale                                  | -0.187435       | 0.180395  | -1.033   | 0.3020         |
| PANSS, general subscale                                   | 0.108567        | 0.298676  | 0.361    | 0.7179         |
| <i>Random effects</i>                                     | <i>Variance</i> | <i>SD</i> |          |                |
| Subject Intercept                                         | 3.448           | 1.857     |          |                |
| Time 2                                                    | 9.868           | 3.141     |          |                |
| Residual                                                  | 3.260           | 1.805     |          |                |

| <b>Verbal learning, AVLT, Delayed recall change score</b> |                        |           |          |                |                        |           |          |                |
|-----------------------------------------------------------|------------------------|-----------|----------|----------------|------------------------|-----------|----------|----------------|
| <i>Fixed effects</i>                                      | <b>Siblings, n=584</b> |           |          |                | <b>Controls, n=276</b> |           |          |                |
|                                                           | <i>Estimate</i>        | <i>SE</i> | <i>t</i> | <i>p-value</i> | <i>Estimate</i>        | <i>SE</i> | <i>t</i> | <i>p-value</i> |
| Intercept                                                 | 0.630201               | 0.129052  | 4.878    | 1.3e-06        | 0.70674                | 0.17991   | 3.918    | 0.000107       |
| Smoking, quitte                                           | 0.052358               | 0.241847  | 0.216    | 0.82938        | -0.50515               | 0.44036   | -1.138   | 0.255965       |
| Smoking, started                                          | -0.389337              | 0.280379  | -1.383   | 0.16719        | 0.81555                | 0.50704   | 1.596    | 0.111241       |
| Time 2                                                    | -0.697138              | 0.183449  | -3.798   | 0.00016        | -0.20606               | 0.26794   | -0.768   | 0.443049       |
| Gender, female                                            | 0.037314               | 0.115781  | 0.321    | 0.74812        | -0.54780               | 0.18407   | -2.957   | 0.003439       |
| Age                                                       | -0.021592              | 0.007104  | -3.030   | 0.00259        | -0.02440               | 0.00881   | -2.752   | 0.006424       |
| Cannabis, urine positive                                  | -0.072474              | 0.273740  | -0.264   | 0.79203        | -0.18680               | 0.47779   | -0.388   | 0.698200       |
| Education                                                 | 0.044231               | 0.016980  | 2.596    | 0.00971        | -0.01655               | 0.02579   | -0.637   | 0.525028       |
| CAPE, negative subscale                                   | -0.066966              | 0.237211  | -0.281   | 0.77860        | -0.11754               | 0.44765   | -0.261   | 0.794619       |
| CAPE, positive subscale                                   | -1.182766              | 0.374356  | -3.149   | 0.00174        | -1.26891               | 0.82456   | -1.528   | 0.127967       |
| CAPE, depressive subscale                                 | 0.252664               | 0.248102  | 1.015    | 0.31071        | 0.21584                | 0.41458   | 0.516    | 0.605947       |
| <i>Random effects</i>                                     | <i>Variance</i>        | <i>SD</i> |          |                | <i>Variance</i>        | <i>SD</i> |          |                |
| Subject Intercept                                         | 3.633                  | 1.906     |          |                | 2.720                  | 1.649     |          |                |
| Time 2                                                    | 11.646                 | 3.413     |          |                | 10.509                 | 3.242     |          |                |
| Residual                                                  | 2.472                  | 1.572     |          |                | 2.858                  | 1.690     |          |                |

| <b>Reasoning and problem solving, WAIS block design, raw change score</b> |                       |           |          |                |
|---------------------------------------------------------------------------|-----------------------|-----------|----------|----------------|
| <i>Fixed effects</i>                                                      | <b>Patients n=513</b> |           |          |                |
|                                                                           | <i>Estimate</i>       | <i>SE</i> | <i>t</i> | <i>p-value</i> |
| Intercept                                                                 | 2.76905               | 1.05968   | 2.605    | 0.00941        |
| Smoking, quitte                                                           | 1.93344               | 1.33621   | 1.439    | 0.15061        |
| Smoking, started                                                          | 0.91502               | 1.71683   | 0.530    | 0.59607        |
| Time 2                                                                    | -0.46998              | 0.77899   | -0.602   | 0.54718        |
| Gender, female                                                            | 0.70468               | 0.77815   | 0.902    | 0.36755        |
| Age                                                                       | -0.08695              | 0.04488   | -1.930   | 0.05434        |
| Antipsychotic medication, yes                                             | -0.81926              | 1.08870   | -0.750   | 0.45359        |
| Cannabis, urine positive                                                  | 0.30188               | 0.98800   | 0.304    | 0.76117        |

|                          |                 |           |        |         |
|--------------------------|-----------------|-----------|--------|---------|
| Education                | -0.17346        | 0.09064   | -1.905 | 0.05734 |
| PANSS, negative subscale | -1.51025        | 0.55809   | -2.693 | 0.00727 |
| PANSS, positive subscale | -1.21500        | 0.71147   | -1.699 | 0.08981 |
| PANSS, general subscale  | 0.58613         | 1.18515   | 0.492  | 0.62289 |
| <i>Random effects</i>    | <i>Variance</i> | <i>SD</i> |        |         |
| Subject Intercept        | 10.88           | 3.299     |        |         |
| Time 2                   | 70.47           | 8.395     |        |         |
| Residual                 | 64.07           | 8.005     |        |         |

| <b>Reasoning and problem solving, WAIS block design, raw change score</b> |                        |           |          |                |                        |           |          |                |
|---------------------------------------------------------------------------|------------------------|-----------|----------|----------------|------------------------|-----------|----------|----------------|
|                                                                           | <b>Siblings, n=589</b> |           |          |                | <b>Controls, n=278</b> |           |          |                |
| <i>Fixed effects</i>                                                      | <i>Estimate</i>        | <i>SE</i> | <i>t</i> | <i>p-value</i> | <i>Estimate</i>        | <i>SE</i> | <i>t</i> | <i>p-value</i> |
| Intercept                                                                 | 3.47111                | 0.47336   | 7.322    | 6.26e-13       | 3.03088                | 0.71786   | 4.209    | 3.26e-05       |
| Smoking, quit                                                             | 0.80388                | 0.94792   | 0.845    | 0.3985         | 0.02701                | 1.71847   | 0.016    | 0.98757        |
| Smoking, started                                                          | 1.46161                | 1.12820   | 1.290    | 0.1974         | 0.81099                | 2.03633   | 0.395    | 0.69276        |
| Time 2                                                                    | 0.18477                | 0.67741   | 0.273    | 0.7853         | -1.16102               | 0.94072   | -1.232   | 0.21900        |
| Gender, female                                                            | -1.23893               | 0.48714   | -2.536   | 0.0115         | -0.34861               | 0.81828   | -0.423   | 0.67235        |
| Age                                                                       | -0.13678               | 0.03000   | -4.547   | 6.91e-06       | -0.10426               | 0.03936   | -2.633   | 0.00901        |
| Cannabis, urine positive                                                  | 0.23059                | 1.09807   | 0.209    | 0.8343         | 1.61553                | 2.00710   | 0.799    | 0.42485        |
| Education                                                                 | -0.02189               | 0.07072   | -0.308   | 0.7578         | -0.03456               | 0.11024   | -0.311   | 0.75610        |
| CAPE, negative subscale                                                   | -0.49155               | 0.99463   | -0.492   | 0.6226         | 1.16927                | 1.92476   | 0.603    | 0.54718        |
| CAPE, positive subscale                                                   | 1.81006                | 1.56790   | 1.151    | 0.2504         | -2.09246               | 3.62243   | -0.573   | 0.56706        |
| CAPE, depressive subscale                                                 | -0.67553               | 1.04198   | -0.646   | 0.5186         | -1.51656               | 1.74802   | -0.860   | 0.39011        |
| <i>Random effects</i>                                                     | <i>Variance</i>        | <i>SD</i> |          |                | <i>Variance</i>        | <i>SD</i> |          |                |
| Subject Intercept                                                         | 24.97                  | 4.997     |          |                | 18.31                  | 4.279     |          |                |
| Time 2                                                                    | 119.44                 | 10.929    |          |                | 61.07                  | 7.815     |          |                |
| Residual                                                                  | 45.35                  | 6.734     |          |                | 60.38                  | 7.770     |          |                |
